# Supplementary material for: To Be or Not to Be a (4,4) Net: Reactions of 4′-{4-(N,N-Diethylaminophenyl)}- and 4′-{4-(N,N-Diphenylaminophenyl)}-3,2′:6′,3″- and 4,2′:6′,4″-Terpyridines with Cobalt(II) Thiocyanate
Source: MDPI journal article supplement (doi:10.3390/cryst12081136), 2022-08-12

---

The following ALERTS were generated. Each ALERT has the format  
**test-name\_ALERT\_alert-type\_alert-level.**  
Click on the hyperlinks for more details of the test.

---

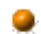

#### Alert level B

PLAT084\_ALERT\_3\_B High wR2 Value (i.e. > 0.25) ..... 0.37 Report

**Author Response: the sample was heavily twinned. A refinement with an hkl4 led to considerably lower R-factors - Rint in particular - but was presenting spurious and intense Q-peaks. The use of the hkl5 fixed this problem but led to higher R-factors.**

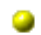

#### Alert level C

RINTA01\_ALERT\_3\_C The value of Rint is greater than 0.12  
Rint given 0.166

**Author Response: the sample was heavily twinned. A refinement with an hkl4 led to considerably lower R-factors - Rint in particular - but was presenting spurious and intense Q-peaks. The use of the hkl5 fixed this problem but led to higher R-factors.**

PLAT020\_ALERT\_3\_C The Value of Rint is Greater Than 0.12 ..... 0.166 Report

**Author Response: the sample was heavily twinned. A refinement with an hkl4 led to considerably lower R-factors - Rint in particular - but was presenting spurious and intense Q-peaks. The use of the hkl5 fixed this problem but led to higher R-factors.**

PLAT082\_ALERT\_2\_C High R1 Value ..... 0.15 Report  
PLAT242\_ALERT\_2\_C Low 'MainMol' Ueq as Compared to Neighbors of C34 Check  
PLAT341\_ALERT\_3\_C Low Bond Precision on C-C Bonds ..... 0.01394 Ang.  
PLAT906\_ALERT\_3\_C Large K Value in the Analysis of Variance ..... 9.455 Check  
PLAT906\_ALERT\_3\_C Large K Value in the Analysis of Variance ..... 2.750 Check  
PLAT906\_ALERT\_3\_C Large K Value in the Analysis of Variance ..... 2.168 Check  
PLAT911\_ALERT\_3\_C Missing FCF Refl Between Thmin & STh/L= 0.600 20 Report

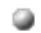

#### Alert level G

PLAT004\_ALERT\_5\_G Polymeric Structure Found with Maximum Dimension 2 Info  
PLAT072\_ALERT\_2\_G SHELXL First Parameter in WGHT Unusually Large 0.12 Report  
PLAT083\_ALERT\_2\_G SHELXL Second Parameter in WGHT Unusually Large 30.00 Why ?  
PLAT794\_ALERT\_5\_G Tentative Bond Valency for Co1 (II) . 1.88 Info  
PLAT802\_ALERT\_4\_G CIF Input Record(s) with more than 80 Characters 1 Info  
PLAT910\_ALERT\_3\_G Missing # of FCF Reflection(s) Below Theta(Min). 2 Note  
PLAT912\_ALERT\_4\_G Missing # of FCF Reflections Above STh/L= 0.600 52 Note  
PLAT930\_ALERT\_2\_G FCF-based Twin Law ( 0 0 1) Est.d BASF 0.38 Check

|                   |                                                  |            |      |       |
|-------------------|--------------------------------------------------|------------|------|-------|
| PLAT931_ALERT_5_G | CIFcalcFCF Twin Law ( 0 0 1)                     | Est.d BASF | 0.38 | Check |
| PLAT933_ALERT_2_G | Number of HKL-OMIT Records in Embedded .res File |            | 10   | Note  |
| PLAT978_ALERT_2_G | Number C-C Bonds with Positive Residual Density. |            | 0    | Info  |
| PLAT992_ALERT_5_G | Repd & Actual _reflns_number_gt Values Differ by |            | 3    | Check |

---

0 **ALERT level A** = Most likely a serious problem - resolve or explain  
 1 **ALERT level B** = A potentially serious problem, consider carefully  
 9 **ALERT level C** = Check. Ensure it is not caused by an omission or oversight  
 12 **ALERT level G** = General information/check it is not something unexpected

0 ALERT type 1 CIF construction/syntax error, inconsistent or missing data  
 7 ALERT type 2 Indicator that the structure model may be wrong or deficient  
 9 ALERT type 3 Indicator that the structure quality may be low  
 2 ALERT type 4 Improvement, methodology, query or suggestion  
 4 ALERT type 5 Informative message, check

---

It is advisable to attempt to resolve as many as possible of the alerts in all categories. Often the minor alerts point to easily fixed oversights, errors and omissions in your CIF or refinement strategy, so attention to these fine details can be worthwhile. In order to resolve some of the more serious problems it may be necessary to carry out additional measurements or structure refinements. However, the purpose of your study may justify the reported deviations and the more serious of these should normally be commented upon in the discussion or experimental section of a paper or in the "special\_details" fields of the CIF. checkCIF was carefully designed to identify outliers and unusual parameters, but every test has its limitations and alerts that are not important in a particular case may appear. Conversely, the absence of alerts does not guarantee there are no aspects of the results needing attention. It is up to the individual to critically assess their own results and, if necessary, seek expert advice.

### Publication of your CIF in IUCr journals

A basic structural check has been run on your CIF. These basic checks will be run on all CIFs submitted for publication in IUCr journals (*Acta Crystallographica*, *Journal of Applied Crystallography*, *Journal of Synchrotron Radiation*); however, if you intend to submit to *Acta Crystallographica Section C* or *E* or *IUCrData*, you should make sure that full publication checks are run on the final version of your CIF prior to submission.

### Publication of your CIF in other journals

Please refer to the *Notes for Authors* of the relevant journal for any special instructions relating to CIF submission.

---

**PLATON version of 18/05/2022; check.def file version of 17/05/2022**

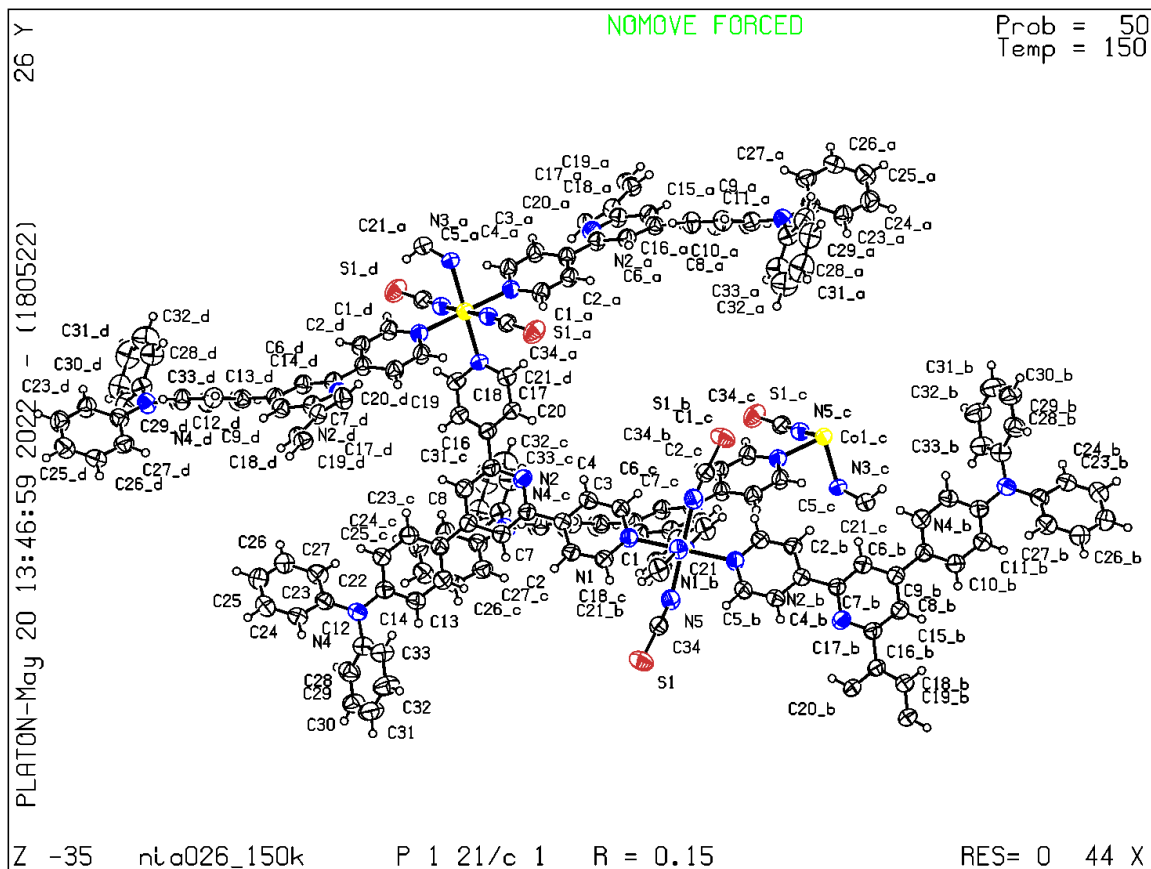

Supplement: s1 [file s1]
