# Supplementary material for: To Be or Not to Be a (4,4) Net: Reactions of 4′-{4-(N,N-Diethylaminophenyl)}- and 4′-{4-(N,N-Diphenylaminophenyl)}-3,2′:6′,3″- and 4,2′:6′,4″-Terpyridines with Cobalt(II) Thiocyanate
Source: MDPI journal article supplement (doi:10.3390/cryst12081136), 2022-08-12

## checkCIF/PLATON report

Structure factors have been supplied for datablock(s) nia003\_150k

THIS REPORT IS FOR GUIDANCE ONLY. IF USED AS PART OF A REVIEW PROCEDURE FOR PUBLICATION, IT SHOULD NOT REPLACE THE EXPERTISE OF AN EXPERIENCED CRYSTALLOGRAPHIC REFEREE.

No syntax errors found.      CIF dictionary      Interpreting this report

### Datablock: nia003\_150k

---

|                        |                                  |                                  |               |
|------------------------|----------------------------------|----------------------------------|---------------|
| Bond precision:        | C-C = 0.0078 A                   | Wavelength=1.54186               |               |
| Cell:                  | a=13.3183 (3)                    | b=12.5045 (2)                    | c=15.2418 (4) |
|                        | alpha=90                         | beta=96.533 (2)                  | gamma=90      |
| Temperature:           | 150 K                            |                                  |               |
|                        | Calculated                       | Reported                         |               |
| Volume                 | 2521.87 (10)                     | 2521.87 (10)                     |               |
| Space group            | P 21/n                           | P 1 21/n 1                       |               |
| Hall group             | -P 2yn                           | -P 2yn                           |               |
| Moiety formula         | C52 H48 Co N10 S2, 0.8 (C H C13) | C52 H50 Co N10 S2, 0.8 (C H C13) |               |
| Sum formula            | C52.80 H48.80 Cl2.40 Co N10 S2   | C52.80 H48.80 Cl2.40 Co N10 S2   |               |
| Mr                     | 1031.55                          | 1031.55                          |               |
| Dx, g cm <sup>-3</sup> | 1.359                            | 1.358                            |               |
| Z                      | 2                                | 2                                |               |
| Mu (mm <sup>-1</sup> ) | 4.982                            | 4.982                            |               |
| F000                   | 1070.8                           | 1071.0                           |               |
| F000'                  | 1071.56                          |                                  |               |
| h, k, lmax             | 16, 15, 18                       | 16, 15, 18                       |               |
| Nref                   | 5021                             | 4963                             |               |
| Tmin, Tmax             | 0.384, 0.451                     | 0.032, 0.063                     |               |
| Tmin'                  | 0.291                            |                                  |               |

Correction method= # Reported T Limits: Tmin=0.032 Tmax=0.063

AbsCorr = MULTI-SCAN

Data completeness= 0.988

Theta (max)= 72.668

R(reflections)= 0.1030( 4678)

wR2(reflections)=  
0.2400( 4963)

S = 0.941

Npar= 377

---

The following ALERTS were generated. Each ALERT has the format

**test-name\_ALERT\_alert-type\_alert-level.**

Click on the hyperlinks for more details of the test.

---

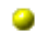

### Alert level C

|                   |                                                  |              |
|-------------------|--------------------------------------------------|--------------|
| PLAT042_ALERT_1_C | Calc. and Reported MoietyFormula Strings Differ  | Please Check |
| PLAT077_ALERT_4_C | Unitcell Contains Non-integer Number of Atoms .. | Please Check |
| PLAT341_ALERT_3_C | Low Bond Precision on C-C Bonds .....            | 0.00779 Ang. |
| PLAT906_ALERT_3_C | Large K Value in the Analysis of Variance .....  | 2.737 Check  |
| PLAT911_ALERT_3_C | Missing FCF Refl Between Thmin & STh/L= 0.600    | 10 Report    |
| PLAT918_ALERT_3_C | Reflection(s) with I(obs) much Smaller I(calc) . | 13 Check     |
| PLAT939_ALERT_3_C | Large Value of Not (SHELXL) Weight Optimized S . | 18.60 Check  |
| PLAT971_ALERT_2_C | Check Calcd Resid. Dens. 0.06Ang From Cl3        | 1.95 eA-3    |
| PLAT971_ALERT_2_C | Check Calcd Resid. Dens. 0.86Ang From Cl2        | 1.83 eA-3    |
| PLAT972_ALERT_2_C | Check Calcd Resid. Dens. 0.36Ang From Cl2        | -1.76 eA-3   |

---

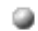

### Alert level G

FORMU01\_ALERT\_1\_G There is a discrepancy between the atom counts in the  
\_chemical\_formula\_sum and \_chemical\_formula\_moiety. This is  
usually due to the moiety formula being in the wrong format.  
Atom count from \_chemical\_formula\_sum: C52.8 H48.8 Cl2.4 Co1 N10 S2  
Atom count from \_chemical\_formula\_moiety:C52.8 H50.8 Cl2.4 Co1 N10 S2

|                   |                                                  |              |
|-------------------|--------------------------------------------------|--------------|
| PLAT002_ALERT_2_G | Number of Distance or Angle Restraints on AtSite | 13 Note      |
| PLAT003_ALERT_2_G | Number of Uiso or Uij Restrained non-H Atoms ... | 1 Report     |
| PLAT004_ALERT_5_G | Polymeric Structure Found with Maximum Dimension | 2 Info       |
| PLAT068_ALERT_1_G | Reported F000 Differs from Calcd (or Missing)... | Please Check |
| PLAT083_ALERT_2_G | SHELXL Second Parameter in WGHT Unusually Large  | 15.00 Why ?  |
| PLAT171_ALERT_4_G | The CIF-Embedded .res File Contains EADP Records | 1 Report     |
| PLAT176_ALERT_4_G | The CIF-Embedded .res File Contains SADI Records | 6 Report     |
| PLAT186_ALERT_4_G | The CIF-Embedded .res File Contains ISOR Records | 1 Report     |
| PLAT187_ALERT_4_G | The CIF-Embedded .res File Contains RIGU Records | 3 Report     |
| PLAT300_ALERT_4_G | Atom Site Occupancy of N4 Constrained at         | 0.5 Check    |
| PLAT300_ALERT_4_G | Atom Site Occupancy of N5 Constrained at         | 0.5 Check    |
| PLAT300_ALERT_4_G | Atom Site Occupancy of Cl Constrained at         | 0.55 Check   |
| PLAT300_ALERT_4_G | Atom Site Occupancy of C2 Constrained at         | 0.55 Check   |
| PLAT300_ALERT_4_G | Atom Site Occupancy of C3 Constrained at         | 0.55 Check   |
| PLAT300_ALERT_4_G | Atom Site Occupancy of C22 Constrained at        | 0.5 Check    |
| PLAT300_ALERT_4_G | Atom Site Occupancy of C23 Constrained at        | 0.5 Check    |
| PLAT300_ALERT_4_G | Atom Site Occupancy of C26 Constrained at        | 0.5 Check    |
| PLAT300_ALERT_4_G | Atom Site Occupancy of C27 Constrained at        | 0.5 Check    |
| PLAT300_ALERT_4_G | Atom Site Occupancy of C30 Constrained at        | 0.45 Check   |
| PLAT300_ALERT_4_G | Atom Site Occupancy of C31 Constrained at        | 0.45 Check   |
| PLAT300_ALERT_4_G | Atom Site Occupancy of C32 Constrained at        | 0.45 Check   |
| PLAT300_ALERT_4_G | Atom Site Occupancy of H1 Constrained at         | 0.55 Check   |
| PLAT300_ALERT_4_G | Atom Site Occupancy of H2 Constrained at         | 0.55 Check   |
| PLAT300_ALERT_4_G | Atom Site Occupancy of H3 Constrained at         | 0.55 Check   |
| PLAT300_ALERT_4_G | Atom Site Occupancy of H22A Constrained at       | 0.5 Check    |
| PLAT300_ALERT_4_G | Atom Site Occupancy of H22B Constrained at       | 0.5 Check    |
| PLAT300_ALERT_4_G | Atom Site Occupancy of H23A Constrained at       | 0.5 Check    |

|                   |                                                  |                |       |       |
|-------------------|--------------------------------------------------|----------------|-------|-------|
| PLAT300_ALERT_4_G | Atom Site Occupancy of H23B                      | Constrained at | 0.5   | Check |
| PLAT300_ALERT_4_G | Atom Site Occupancy of H23C                      | Constrained at | 0.5   | Check |
| PLAT300_ALERT_4_G | Atom Site Occupancy of H24A                      | Constrained at | 0.5   | Check |
| PLAT300_ALERT_4_G | Atom Site Occupancy of H24B                      | Constrained at | 0.5   | Check |
| PLAT300_ALERT_4_G | Atom Site Occupancy of H24C                      | Constrained at | 0.5   | Check |
| PLAT300_ALERT_4_G | Atom Site Occupancy of H24D                      | Constrained at | 0.5   | Check |
| PLAT300_ALERT_4_G | Atom Site Occupancy of H26A                      | Constrained at | 0.5   | Check |
| PLAT300_ALERT_4_G | Atom Site Occupancy of H26B                      | Constrained at | 0.5   | Check |
| PLAT300_ALERT_4_G | Atom Site Occupancy of H27A                      | Constrained at | 0.5   | Check |
| PLAT300_ALERT_4_G | Atom Site Occupancy of H27B                      | Constrained at | 0.5   | Check |
| PLAT300_ALERT_4_G | Atom Site Occupancy of H27C                      | Constrained at | 0.5   | Check |
| PLAT300_ALERT_4_G | Atom Site Occupancy of H30                       | Constrained at | 0.45  | Check |
| PLAT300_ALERT_4_G | Atom Site Occupancy of H31                       | Constrained at | 0.45  | Check |
| PLAT300_ALERT_4_G | Atom Site Occupancy of H32                       | Constrained at | 0.45  | Check |
| PLAT300_ALERT_4_G | Atom Site Occupancy of Cl1                       | Constrained at | 0.4   | Check |
| PLAT300_ALERT_4_G | Atom Site Occupancy of Cl2                       | Constrained at | 0.4   | Check |
| PLAT300_ALERT_4_G | Atom Site Occupancy of Cl3                       | Constrained at | 0.4   | Check |
| PLAT300_ALERT_4_G | Atom Site Occupancy of C29                       | Constrained at | 0.4   | Check |
| PLAT300_ALERT_4_G | Atom Site Occupancy of H29                       | Constrained at | 0.4   | Check |
| PLAT301_ALERT_3_G | Main Residue Disorder .....(Resd 1 )             |                | 18%   | Note  |
| PLAT302_ALERT_4_G | Anion/Solvent/Minor-Residue Disorder (Resd 2 )   |                | 100%  | Note  |
| PLAT410_ALERT_2_G | Short Intra H...H Contact H18 ..H24A .           |                | 2.00  | Ang.  |
|                   | x,y,z =                                          | 1_555          | Check |       |
| PLAT410_ALERT_2_G | Short Intra H...H Contact H20 ..H22A .           |                | 2.07  | Ang.  |
|                   | x,y,z =                                          | 1_555          | Check |       |
| PLAT412_ALERT_2_G | Short Intra XH3 .. XHn H23B ..H25A .             |                | 1.97  | Ang.  |
|                   | x,y,z =                                          | 1_555          | Check |       |
| PLAT789_ALERT_4_G | Atoms with Negative _atom_site_disorder_group #  |                | 5     | Check |
| PLAT802_ALERT_4_G | CIF Input Record(s) with more than 80 Characters |                | 1     | Info  |
| PLAT860_ALERT_3_G | Number of Least-Squares Restraints .....         |                | 73    | Note  |
| PLAT912_ALERT_4_G | Missing # of FCF Reflections Above STh/L= 0.600  |                | 49    | Note  |
| PLAT933_ALERT_2_G | Number of HKL-OMIT Records in Embedded .res File |                | 4     | Note  |
| PLAT941_ALERT_3_G | Average HKL Measurement Multiplicity .....       |                | 4.4   | Low   |
| PLAT978_ALERT_2_G | Number C-C Bonds with Positive Residual Density. |                | 0     | Info  |

---

0 **ALERT level A** = Most likely a serious problem - resolve or explain  
 0 **ALERT level B** = A potentially serious problem, consider carefully  
 10 **ALERT level C** = Check. Ensure it is not caused by an omission or oversight  
 59 **ALERT level G** = General information/check it is not something unexpected

3 ALERT type 1 CIF construction/syntax error, inconsistent or missing data  
 11 ALERT type 2 Indicator that the structure model may be wrong or deficient  
 8 ALERT type 3 Indicator that the structure quality may be low  
 46 ALERT type 4 Improvement, methodology, query or suggestion  
 1 ALERT type 5 Informative message, check

---

It is advisable to attempt to resolve as many as possible of the alerts in all categories. Often the minor alerts point to easily fixed oversights, errors and omissions in your CIF or refinement strategy, so attention to these fine details can be worthwhile. In order to resolve some of the more serious problems it may be necessary to carry out additional measurements or structure refinements. However, the purpose of your study may justify the reported deviations and the more serious of these should normally be commented upon in the discussion or experimental section of a paper or in the "special\_details" fields of the CIF. checkCIF was carefully designed to identify outliers and unusual parameters, but every test has its limitations and alerts that are not important in a particular case may appear. Conversely, the absence of alerts does not guarantee there are no aspects of the results needing attention. It is up to the individual to critically assess their own results and, if necessary, seek expert advice.

### **Publication of your CIF in IUCr journals**

A basic structural check has been run on your CIF. These basic checks will be run on all CIFs submitted for publication in IUCr journals (*Acta Crystallographica*, *Journal of Applied Crystallography*, *Journal of Synchrotron Radiation*); however, if you intend to submit to *Acta Crystallographica Section C* or *E* or *IUCrData*, you should make sure that full publication checks are run on the final version of your CIF prior to submission.

### **Publication of your CIF in other journals**

Please refer to the *Notes for Authors* of the relevant journal for any special instructions relating to CIF submission.

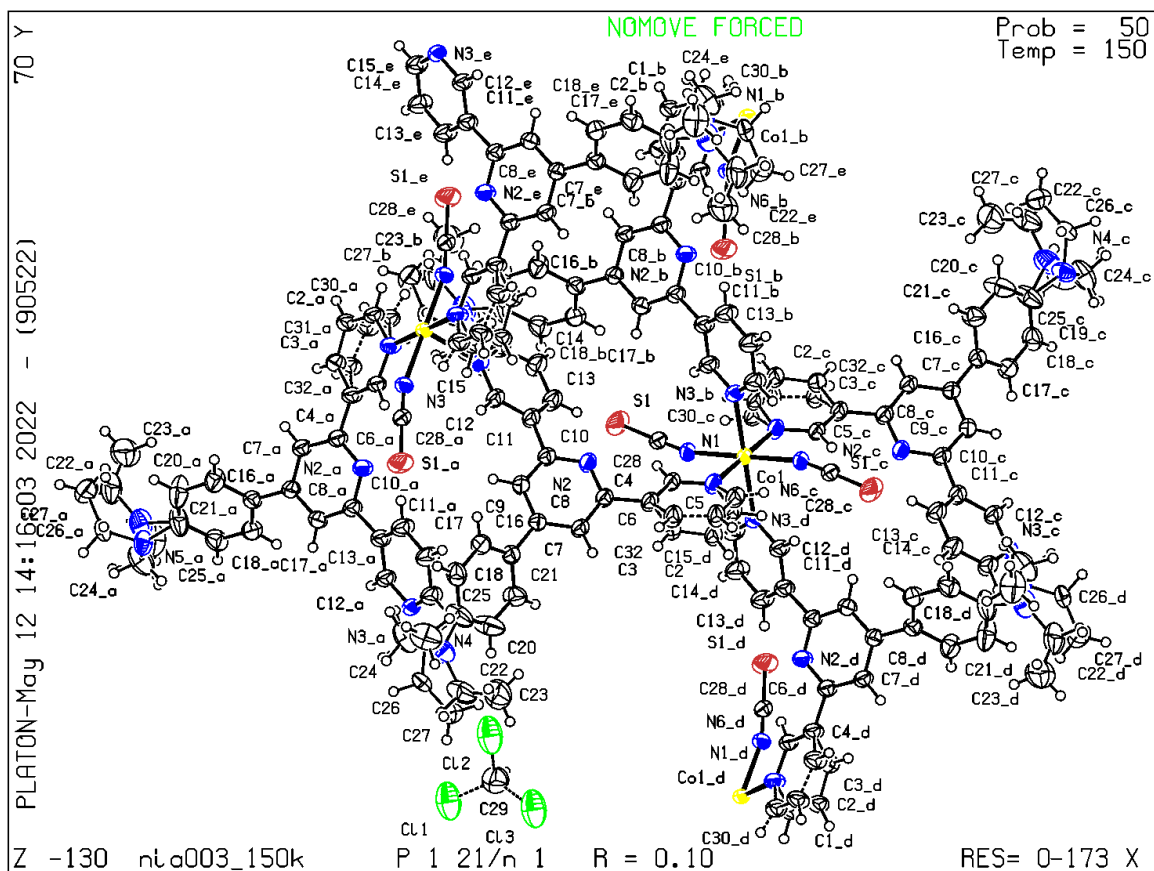

Supplement: s1 [file s1]
